# Supplementary material for: Study on the interaction between emodin and ethyl violet by resonance Rayleigh scattering technique
Source: Royal Society of Chemistry journal article supplement (doi:10.1039/c4ra04613g), 2014-01-01
Supplement: c4ra04613g1.pdf [file c4ra04613g1.pdf]

## Supporting information

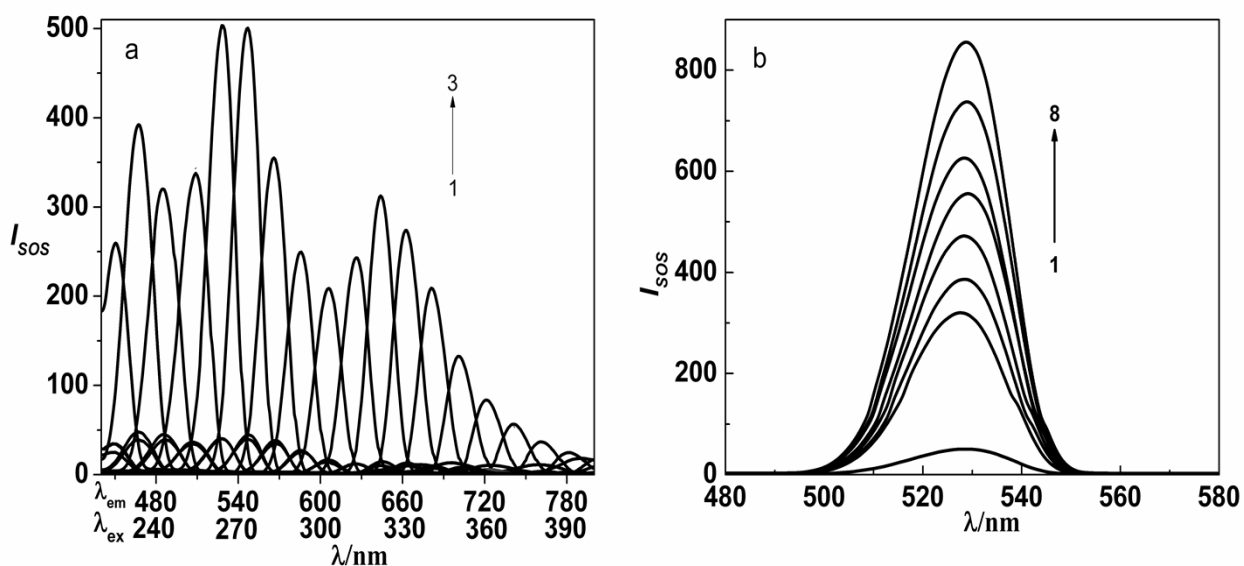

Fig.1. SOS spectra of EMO-EV system

(a) 1EV; 2 EMO; 3 EV-EMO;  $C_{EMO}: 1.0 \mu g \cdot mL^{-1}$ ,  $C_{EV}: 1.2 \times 10^{-5} mol \cdot L^{-1}$  (b) EV-EMO system.  $C_{EMO}$  (1-8) 0, 0.4, 1.0, 1.5, 2.3, 3.2, 3.8, 4.8  $\mu g \cdot mL^{-1}$ ;  $C_{EV}: 1.2 \times 10^{-5} mol \cdot L^{-1}$ ; pH=7.0

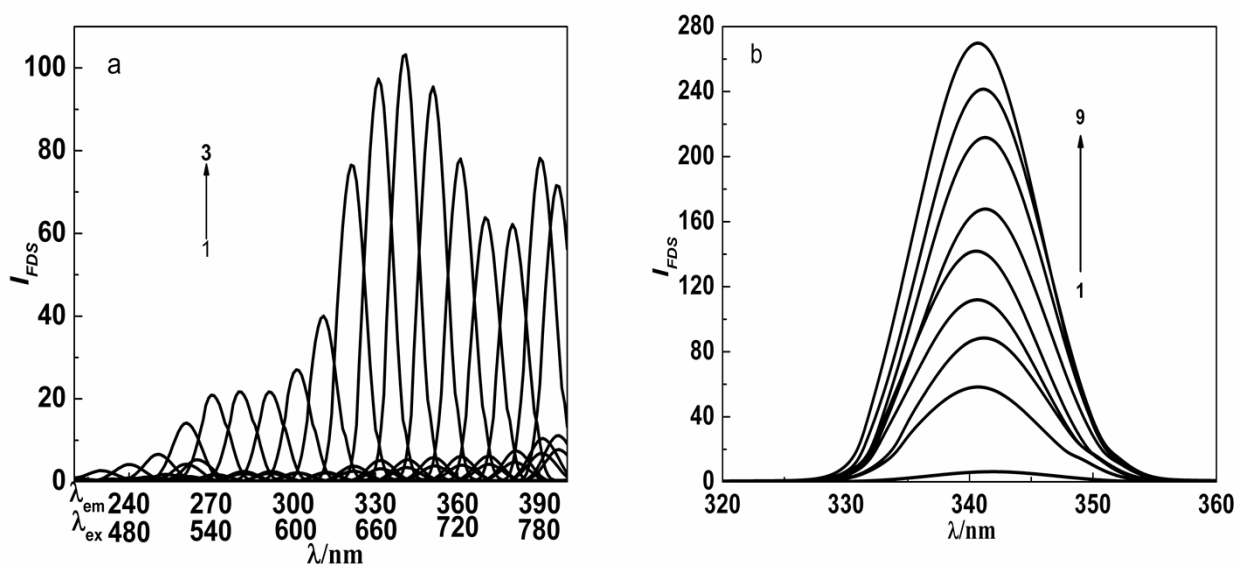

Fig.2. FDS spectra of EMO-EV system

(a) 1EV; 2 EMO; 3 EV-EMO;  $C_{EMO}: 1.0 \mu g \cdot mL^{-1}$ ,  $C_{EV}: 1.2 \times 10^{-5} mol \cdot L^{-1}$  (b) EV-EMO system.  $C_{EMO}$  (1-8) 0, 0.4, 1.0, 1.5, 2.3, 3.2, 3.8, 4.2, 4.8  $\mu g \cdot mL^{-1}$ ;  $C_{EV}: 1.2 \times 10^{-5} mol \cdot L^{-1}$ ; pH=7.0

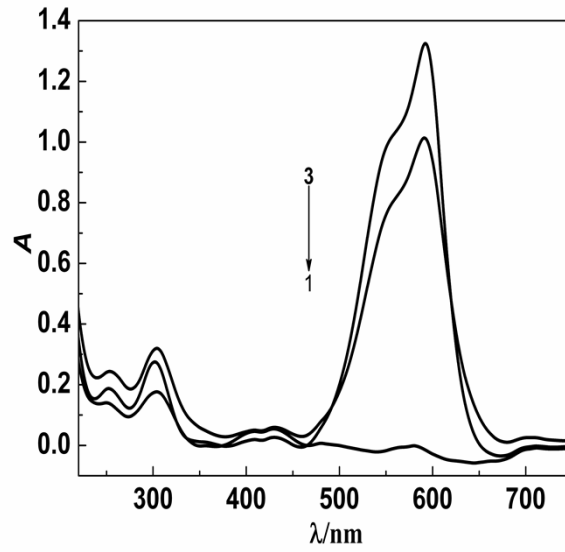

Fig.3. Absorption spectra  
 Measured against water blank. 1 EMO; 2 EV; 3 EMO -EV;  
 $C_{EMO}: 1.0\mu\text{g} \cdot \text{mL}^{-1}$ ,  $C_{EV}: 1.2 \times 10^{-5} \text{mol} \cdot \text{L}^{-1}$   $C_{EV}: 1.2 \times 10^{-5}$

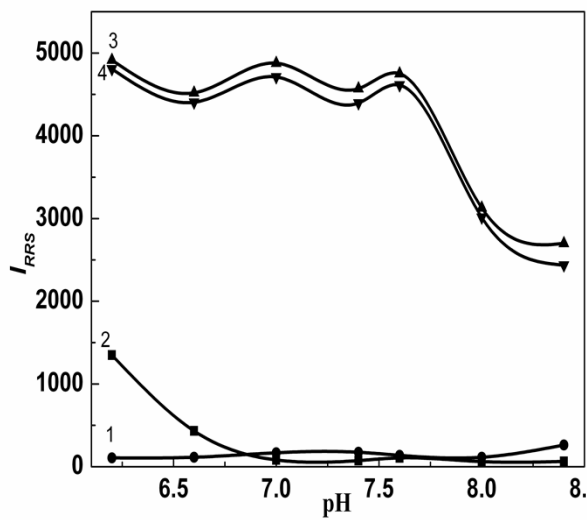

Fig.4. Effect of acidity  
 1  $I^0$ ; 2  $I^{EMO}$ ; 3  $I$ ; 4  $\Delta I$   $C_{EMO}: 1.0\mu\text{g} \cdot \text{mL}^{-1}$ ,  
 $C_{EV}: 1.2 \times 10^{-5} \text{mol} \cdot \text{L}^{-1}$

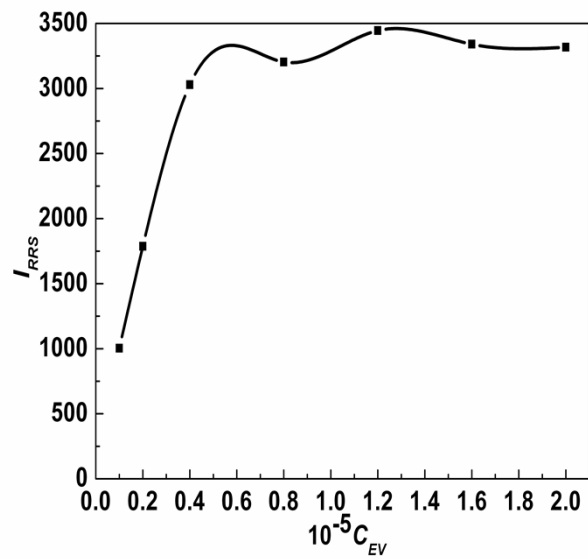

Fig.5. Effect of EV concentration  
 $C_{EMO}: 1.0\mu\text{g} \cdot \text{mL}^{-1}$ ,  $\text{pH}=7.0$

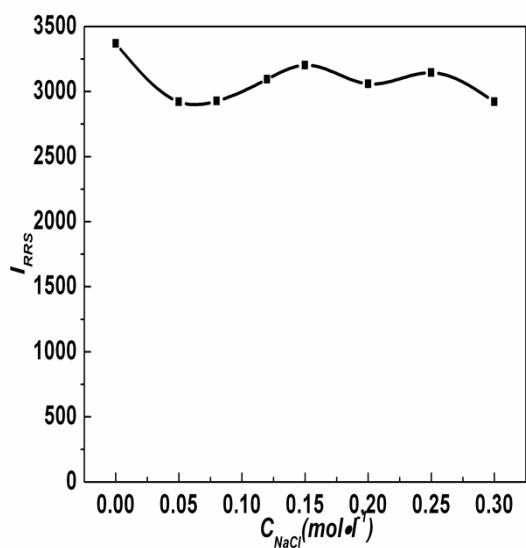

Fig.6. Effect of EV concentration

$C_{\text{EMO}}: 1.0\mu\text{g}\cdot\text{mL}^{-1}$ ,  $\text{pH}=7.0$

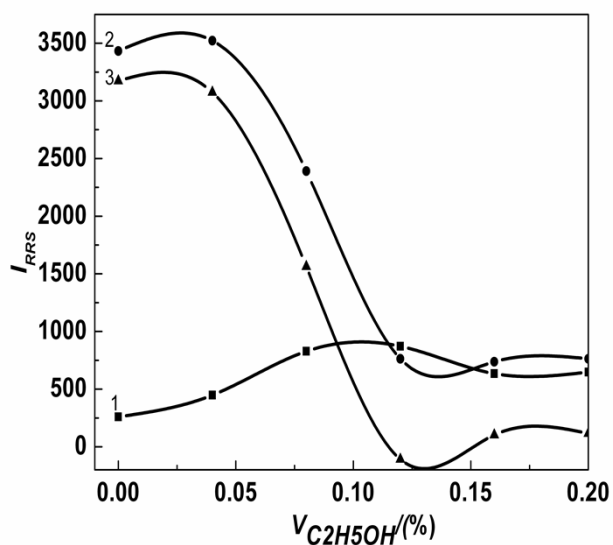

Fig.7. Effect of  $\text{C}_2\text{H}_5\text{OH}$  concentration

1  $I^{\text{EMO}}$ ; 2  $I$ ; 3  $\Delta I$   $C_{\text{EMO}}: 1.0\mu\text{g}\cdot\text{mL}^{-1}$ ,  $C_{\text{EV}}: 1.2\times 10^{-5}\text{mol}\cdot\text{L}^{-1}$   $\text{pH}=7.0$

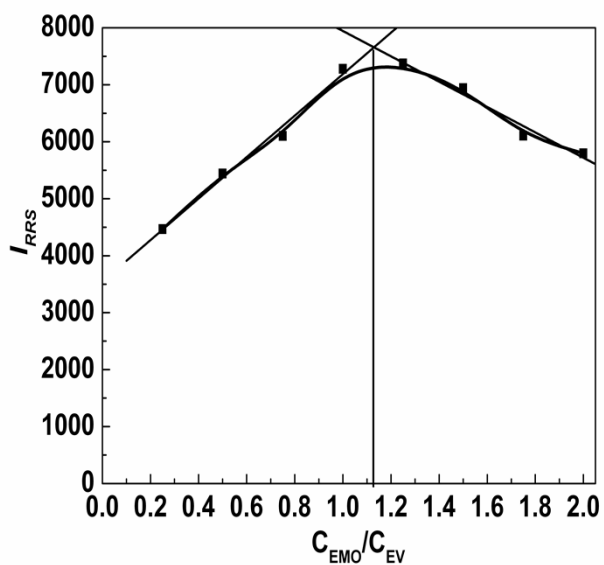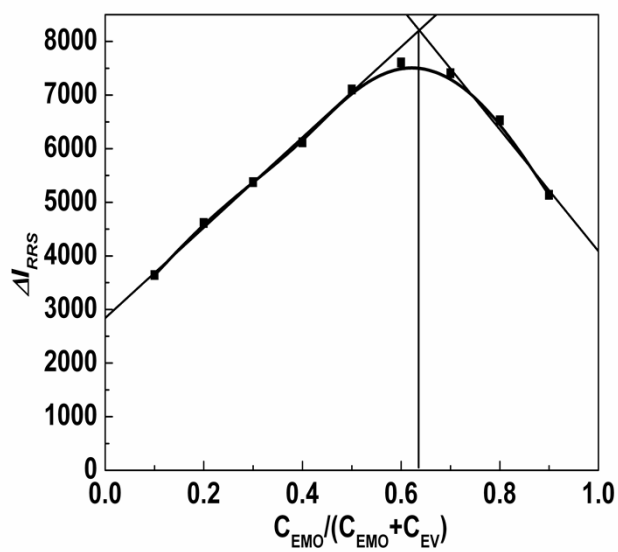

Fig.8. The composition ratio of EMO with EV.  $C_{\text{EMO}} = C_{\text{EV}}: 7.4\times 10^{-5}\text{mol}\cdot\text{L}^{-1}$   $\text{pH}=7.0$

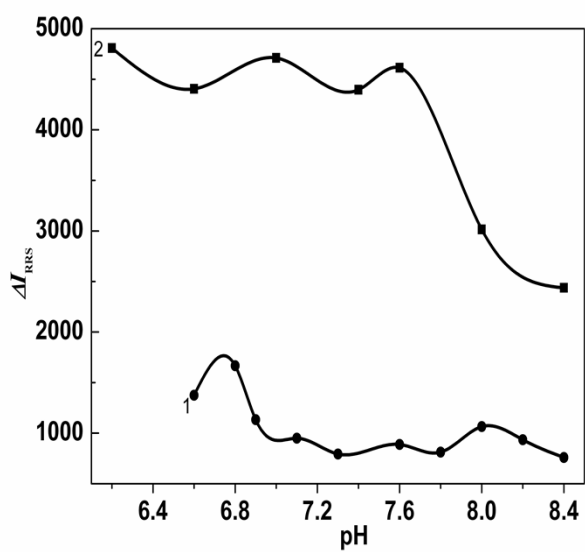

Fig.9. Effect of acidity

1 *CV*; 2 *EV*  $C_{EMO}$ :  $1.0\mu\text{g}\cdot\text{mL}^{-1}$ ,  $C_{EV}$ :  $1.0\times 10^{-5}\text{mol}\cdot\text{L}^{-1}$ ,  $C_{CV}$ :  $1.0\times 10^{-5}\text{mol}\cdot\text{L}^{-1}$

A Hitachi F-2500 spectrofluorophotometer (Tokyo, Japan)

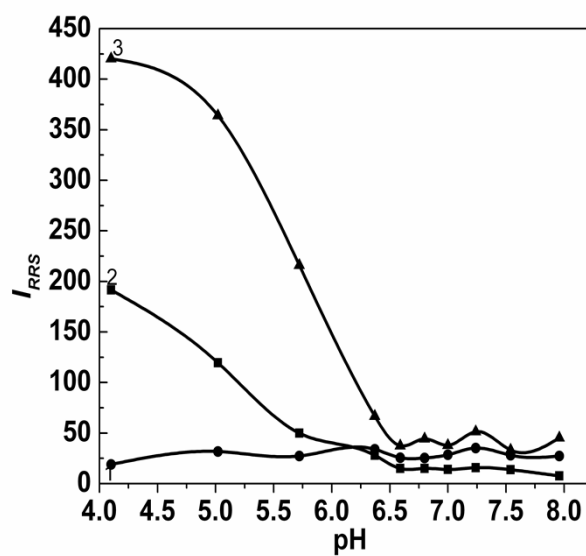

Fig.10. Effect of acidity

1 *MG*; 2 *EMO*; 3 *MG-EMO*  $C_{EMO}$ :  $1.0\mu\text{g}\cdot\text{mL}^{-1}$ ,  $C_{EV}$ :  $1.0\times 10^{-5}\text{mol}\cdot\text{L}^{-1}$ ,  $C_{MG}$ :  $1.0\times 10^{-5}\text{mol}\cdot\text{L}^{-1}$

A Hitachi F-4500 spectrofluorophotometer (Tokyo, Japan)
